# Supplementary material for: Safety of SARS-CoV-2 Vaccination in Patients with Vascular Malformations: Patient-Reported Adverse Vaccine Reactions
Source: PubMed Central journal article supplement — Ann Vasc Dis. 2023 Jun 25;16(2):101–7. doi: 10.3400/avd.oa.22-00126 (PMC10288124; doi:10.3400/avd.oa.22-00126), 2023-06-25
Supplement: avd-16-2-oa.22-00126-s001.pdf [file avd-16-2-oa.22-00126-s001.pdf]

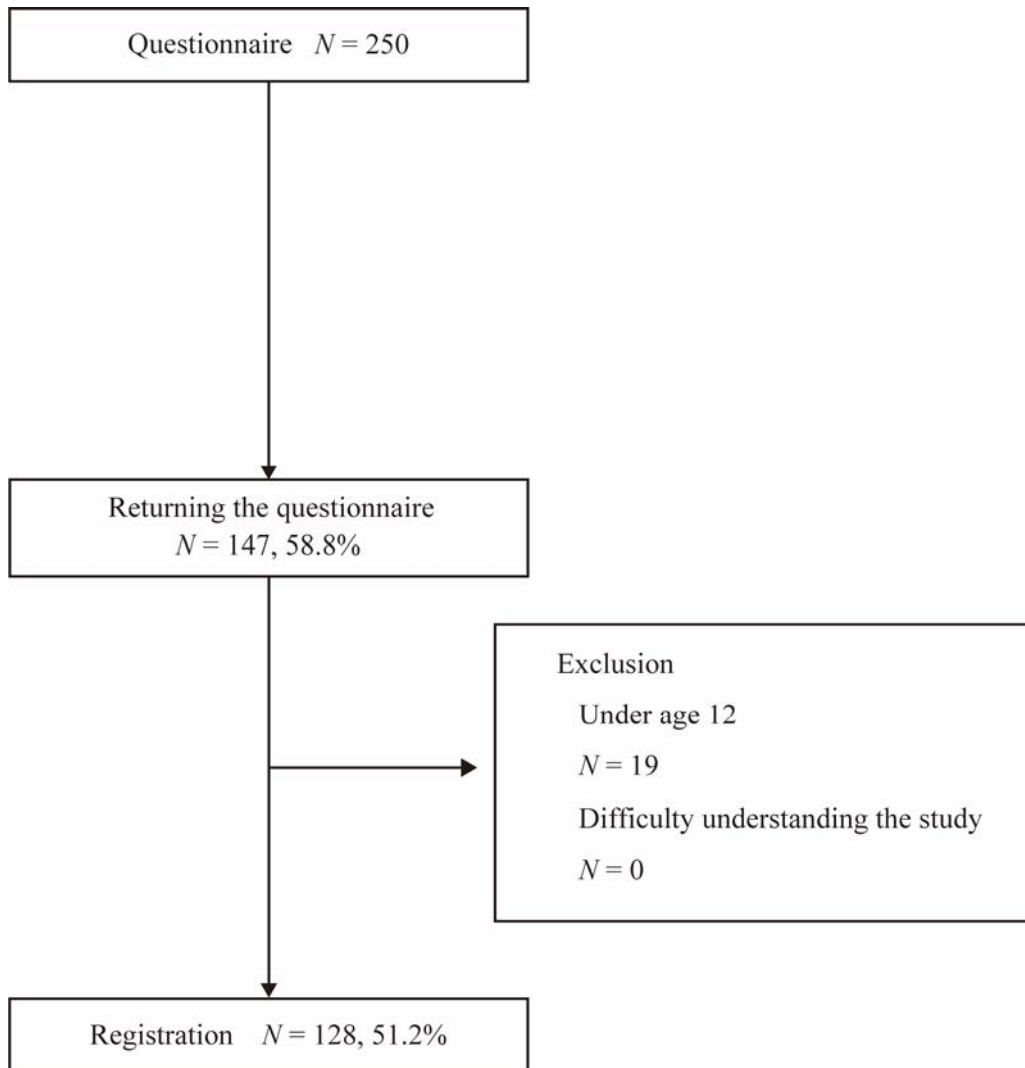

**Supplementary Figure 1.** Inclusion and exclusion of participants.

**Supplementary Table S1.** Comparison of Vaccinated and Unvaccinated Subject

| Item                                      | Vaccinated (N = 96) |         | Unvaccinated (N = 32) |       |
|-------------------------------------------|---------------------|---------|-----------------------|-------|
|                                           | N                   | Percent | N                     | N     |
| <b>Age</b>                                |                     |         |                       |       |
| 12–19                                     | 17                  | 17.7%   | 14                    | 43.7% |
| 20–29                                     | 24                  | 25.0%   | 3                     | 9.4%  |
| 30–39                                     | 12                  | 12.5%   | 5                     | 15.6% |
| 40–49                                     | 18                  | 18.8%   | 9                     | 28.1% |
| 50–59                                     | 22                  | 22.9%   | 1                     | 3.1%  |
| 60–                                       | 3                   | 3.1%    | 0                     | 0%    |
| <b>Sex</b>                                |                     |         |                       |       |
| Female                                    | 53                  | 55.2%   | 14                    | 43.8% |
| Male                                      | 43                  | 44.8%   | 18                    | 56.3% |
| <b>Type of vascular malformations</b>     |                     |         |                       |       |
| Hemangioma                                | 23                  | 24.0%   | 9                     | 28.1% |
| VM                                        | 43                  | 58.3%   | 13                    | 40.7% |
| CM                                        | 5                   | 5.2%    | 3                     | 9.4%  |
| AVM                                       | 36                  | 37.5%   | 11                    | 34.4% |
| LM                                        | 10                  | 10.4%   | 6                     | 18.8% |
| KTWS                                      | 7                   | 7.3%    | 3                     | 9.4%  |
| BRBNS                                     | 0                   | 0%      | 2                     | 6.3%  |
| Unknown                                   | 1                   | 1.0%    | 0                     | 0%    |
| <b>Location of vascular malformations</b> |                     |         |                       |       |
| Head and neck                             | 23                  | 24.0%   | 9                     | 28.1% |
| Upper extremities                         | 18                  | 18.8%   | 4                     | 12.5% |
| Trunk                                     | 13                  | 13.5%   | 6                     | 18.8% |
| Lower extremities                         | 57                  | 59.3%   | 17                    | 53.1% |
| Viscera                                   | 2                   | 2.1%    | 1                     | 3.1%  |
| Systemic                                  | 0                   | 0%      | 2                     | 6.3%  |
| <b>Medical history</b>                    |                     |         |                       |       |

|                           |    |       |    |       |
|---------------------------|----|-------|----|-------|
| COVID-19 infection        | 2  | 2.1%  | 0  | 0%    |
| Hypertension              | 6  | 6.3%  | 1  | 3.1%  |
| Diabetes mellitus         | 3  | 3.1%  | 0  | 0%    |
| Asthma                    | 14 | 14.6% | 5  | 15.6% |
| Seizure                   | 4  | 4.2%  | 0  | 0%    |
| Stroke                    | 2  | 2.1%  | 1  | 3.1%  |
| Heart disease             | 0  | 0%    | 3  | 9.4%  |
| Thromboembolism           | 7  | 7.3%  | 5  | 15.6% |
| Coagulation abnormalities | 1  | 1.0%  | 3  | 9.4%  |
| Malignancy                | 3  | 3.1%  | 1  | 3.1%  |
| Others                    | 6  | 6.3%  | 2  | 6.3%  |
| None of the above         | 58 | 60.4% | 16 | 50.0% |
| <b>Allergy</b>            |    |       |    |       |
| Hay fever                 | 3  | 3.1%  | 1  | 3.1%  |
| Contrast agents           | 5  | 5.2%  | 1  | 3.1%  |
| Others                    | 12 | 12.5% | 7  | 21.9% |
| None of the above         | 78 | 81.3% | 25 | 78.1% |
| <b>Medication</b>         |    |       |    |       |
| Antithrombotic drug       | 5  | 5.2%  | 7  | 21.9% |
| Sirolimus                 | 3  | 3.1%  | 3  | 9.4%  |
| Immunosuppressor          | 1  | 1.0%  | 2  | 6.3%  |
| Beta blocker              | 1  | 1.0%  | 1  | 3.1%  |
| Others                    | 26 | 27.1% | 6  | 18.8% |
| None of the above         | 60 | 62.5% | 20 | 62.5% |

VM: venous malformation; CM: capillary malformation; AVM: arteriovenous malformation; LM: lymphatic malformation; KTWS: Klippel–Trenaunay syndrome/Parkes–Weber syndrome; BRBNS: blue rubber bleb nevus syndrome

**Supplementary Table S2.** Reasons for not taking vaccinations

| Reasons                                                                                | Total (N = 32) |         |
|----------------------------------------------------------------------------------------|----------------|---------|
|                                                                                        | N              | Percent |
| Concerns about the vaccine adverse reactions by subjects themselves                    | 24             | 77.4%   |
| Concerns about embolism or venous thrombosis after vaccinations by subjects themselves | 4              | 12.9%   |
| Concerns about the vaccine adverse reactions by others                                 | 4              | 12.9%   |
| Others                                                                                 | 3              | 9.7%    |
| No reply                                                                               | 1              | 3.1%    |

**Supplementary Table S3.** Reported adverse reactions of each type of vascular malformations following SARS-CoV-2 vaccine dose 1

|                                                            | Total<br>(N = 96) |         | Hemangioma<br>(N = 23) |         | VM<br>(N = 43) |         | CM<br>(N = 5) |         | AVM<br>(N = 36) |         | LM<br>(N = 10) |         | KT/PW<br>(N = 7) |         |
|------------------------------------------------------------|-------------------|---------|------------------------|---------|----------------|---------|---------------|---------|-----------------|---------|----------------|---------|------------------|---------|
|                                                            | N                 | Percent | N                      | Percent | N              | Percent | N             | Percent | N               | Percent | N              | Percent | N                | Percent |
| <b>General adverse reactions</b>                           |                   |         |                        |         |                |         |               |         |                 |         |                |         |                  |         |
| At least one adverse reaction                              | 84                | 87.5%   | 18                     | 78.3%   | 37             | 86.0%   | 5             | 100%    | 32              | 88.9%   | 9              | 90.0%   | 7                | 100%    |
| Pain at the injected site                                  | 69                | 71.9%   | 14                     | 60.9%   | 31             | 72.1%   | 5             | 100%    | 26              | 72.2%   | 8              | 80.0%   | 6                | 85.7%   |
| Swelling at the injected site                              | 26                | 27.1%   | 7                      | 30.4%   | 15             | 34.9%   | 3             | 60.0%   | 9               | 25.0%   | 6              | 60.0%   | 3                | 42.9%   |
| Induration at the injected site                            | 9                 | 9.4%    | 3                      | 13.0%   | 3              | 7.0%    | 0             | 0%      | 4               | 11.1%   | 2              | 20.0%   | 1                | 14.3%   |
| Itching at the injected site                               | 7                 | 7.3%    | 5                      | 21.7%   | 3              | 7.0%    | 1             | 20.0%   | 2               | 5.6%    | 2              | 20.0%   | 1                | 14.3%   |
| Fever                                                      | 21                | 21.9%   | 3                      | 13.0%   | 10             | 23.3%   | 3             | 60.0%   | 10              | 27.8%   | 3              | 30.0%   | 1                | 14.3%   |
| Sore muscles                                               | 15                | 15.6%   | 4                      | 17.4%   | 8              | 18.6%   | 0             | 0%      | 8               | 22.2%   | 1              | 10.0%   | 1                | 14.3%   |
| Arthralgia                                                 | 7                 | 7.3%    | 2                      | 8.7%    | 5              | 11.6%   | 0             | 0%      | 3               | 8.3%    | 1              | 10.0%   | 0                | 0%      |
| Headache                                                   | 21                | 21.9%   | 4                      | 17.4%   | 8              | 18.6%   | 0             | 0%      | 9               | 25%     | 3              | 30.0%   | 2                | 28.6%   |
| Fatigue                                                    | 6                 | 6.3%    | 1                      | 4.3%    | 4              | 9.3%    | 0             | 0%      | 3               | 8.3%    | 1              | 10.0%   | 0                | 0%      |
| Anaphylaxis                                                | 0                 | 0%      | 0                      | 0%      | 0              | 0%      | 0             | 0%      | 0               | 0%      | 0              | 0%      | 0                | 0%      |
| Thromboembolism                                            | 0                 | 0%      | 0                      | 0%      | 0              | 0%      | 0             | 0%      | 0               | 0%      | 0              | 0%      | 0                | 0%      |
| Others                                                     | 1                 | 1.0%    | 0                      | 0%      | 0              | 0%      | 0             | 0%      | 1               | 2.8%    | 0              | 0%      | 0                | 0%      |
| <b>Adverse reactions related to vascular malformations</b> |                   |         |                        |         |                |         |               |         |                 |         |                |         |                  |         |
| At least one adverse reaction                              | 17                | 17.7%   | 4                      | 17.4%   | 8              | 18.6%   | 1             | 20.0%   | 8               | 22.2%   | 3              | 30.0%   | 2                | 28.6%   |
| Pain at the lesion site                                    | 16                | 16.7%   | 4                      | 17.4%   | 8              | 18.6%   | 1             | 20.0%   | 7               | 19.4%   | 3              | 30.0%   | 2                | 28.6%   |
| Redness at the lesion site                                 | 2                 | 2.1%    | 1                      | 4.3%    | 2              | 4.7%    | 1             | 20.0%   | 2               | 5.6%    | 1              | 10.0%   | 0                | 0%      |
| Swelling at the lesion site                                | 5                 | 5.2%    | 2                      | 8.7%    | 5              | 11.6%   | 1             | 20.0%   | 2               | 5.6%    | 2              | 20.0%   | 0                | 0%      |
| Enlargement at the lesion site                             | 1                 | 1.0%    | 0                      | 0%      | 1              | 2.3%    | 1             | 20.0%   | 1               | 2.8%    | 0              | 0%      | 0                | 0%      |
| Thrombosis at the lesion site                              | 0                 | 0%      | 0                      | 0%      | 0              | 0%      | 0             | 0%      | 0               | 0%      | 0              | 0%      | 0                | 0%      |
| Others                                                     | 1                 | 1.0%    | 0                      | 0%      | 0              | 0%      | 0             | 0%      | 1               | 2.8%    | 0              | 0%      | 0                | 0%      |

VM: venous malformation; CM: capillary malformation; AVM: arteriovenous malformation; LM: lymphatic malformation; KT/PW: Klippel–Trenaunay syndrome/Parkes–Weber syndrome

**Supplementary Table S4.** Reported adverse reactions of each type of vascular malformations following SARS-CoV-2 vaccine dose 2

|                                                            | Total<br>(N = 94) |         | Hemangioma<br>(N = 23) |         | VM<br>(N = 41) |         | CM<br>(N = 5) |         | AVM<br>(N = 36) |         | LM<br>(N = 9) |         | KT/PW<br>(N = 7) |         |
|------------------------------------------------------------|-------------------|---------|------------------------|---------|----------------|---------|---------------|---------|-----------------|---------|---------------|---------|------------------|---------|
|                                                            | N                 | Percent | N                      | Percent | N              | Percent | N             | Percent | N               | Percent | N             | Percent | N                | Percent |
| <b>General adverse reactions</b>                           |                   |         |                        |         |                |         |               |         |                 |         |               |         |                  |         |
| At least one adverse reaction                              | 84                | 89.4%   | 17                     | 77.3%   | 35             | 85.4%   | 5             | 100.0%  | 33              | 91.7%   | 8             | 88.9%   | 7                | 100%    |
| Pain at the injected site                                  | 71                | 75.5%   | 13                     | 59.1%   | 30             | 73.2%   | 5             | 100.0%  | 30              | 83.3%   | 7             | 77.8%   | 5                | 71.4%   |
| Swelling at the injected site                              | 33                | 35.1%   | 8                      | 36.4%   | 20             | 48.8%   | 3             | 30.0%   | 10              | 27.8%   | 7             | 77.8%   | 2                | 28.6%   |
| Induration at the injected site                            | 9                 | 9.6%    | 3                      | 13.6%   | 3              | 7.3%    | 1             | 20.0%   | 4               | 11.1%   | 3             | 33.3%   | 1                | 14.3%   |
| Itching at the injected site                               | 10                | 10.6%   | 4                      | 18.2%   | 4              | 9.8%    | 1             | 20.0%   | 3               | 8.3%    | 2             | 22.2%   | 2                | 28.6%   |
| Fever                                                      | 51                | 54.3%   | 9                      | 40.9%   | 2              | 51.2%   | 3             | 60.0%   | 21              | 58.3%   | 5             | 55.6%   | 5                | 71.4%   |
| Sore muscles                                               | 23                | 24.5%   | 3                      | 13.6%   | 10             | 24.4%   | 1             | 20.0%   | 12              | 33.3%   | 1             | 11.1%   | 2                | 28.6%   |
| Arthralgia                                                 | 23                | 24.5%   | 4                      | 18.2%   | 9              | 22.0%   | 1             | 20.0%   | 11              | 30.6%   | 4             | 44.4%   | 1                | 14.3%   |
| Headache                                                   | 26                | 27.7%   | 5                      | 22.7%   | 11             | 26.8%   | 0             | 0.0%    | 12              | 33.3%   | 3             | 33.3%   | 2                | 28.6%   |
| Fatigue                                                    | 13                | 13.8%   | 2                      | 9.1%    | 4              | 9.8%    | 0             | 0.0%    | 8               | 22.2%   | 1             | 11.1%   | 1                | 14.3%   |
| Anaphylaxis                                                | 0                 | 0%      | 0                      | 0%      | 0              | 0%      | 0             | 0%      | 0               | 0%      | 0             | 0%      | 0                | 0%      |
| Thromboembolism                                            | 0                 | 0%      | 0                      | 0%      | 0              | 0%      | 0             | 0%      | 0               | 0%      | 0             | 0%      | 0                | 0%      |
| Others                                                     | 1                 | 1.1%    | 0                      | 0%      | 0              | 0%      | 0             | 0.0%    | 1               | 2.8%    | 0             | 0%      | 0                | 0%      |
| <b>Adverse reactions related to vascular malformations</b> |                   |         |                        |         |                |         |               |         |                 |         |               |         |                  |         |
| At least one adverse reaction                              | 15                | 16.0%   | 4                      | 18.2%   | 7              | 17.1%   | 1             | 20.0%   | 6               | 16.7%   | 2             | 22.2%   | 3                | 42.9%   |
| Pain at the lesion site                                    | 14                | 14.9%   | 4                      | 18.2%   | 7              | 17.1%   | 1             | 20.0%   | 5               | 13.9%   | 1             | 11.1%   | 3                | 42.9%   |
| Redness at the lesion site                                 | 4                 | 4.3%    | 0                      | 0%      | 1              | 2.4%    | 1             | 20.0%   | 2               | 5.6%    | 1             | 11.1%   | 2                | 28.6%   |
| Swelling at the lesion site                                | 6                 | 6.4%    | 2                      | 9.1%    | 4              | 9.8%    | 1             | 20.0%   | 3               | 8.3%    | 2             | 22.2%   | 1                | 14.3%   |
| Enlargement at the lesion site                             | 3                 | 3.2%    | 1                      | 4.5%    | 2              | 4.9%    | 1             | 20.0%   | 2               | 5.6%    | 1             | 11.1%   | 1                | 14.3%   |
| Thrombosis at the lesion site                              | 0                 | 0%      | 0                      | 0%      | 0              | 0%      | 0             | 0%      | 0               | 0%      | 0             | 0%      | 0                | 0%      |
| Others                                                     | 0                 | 0%      | 0                      | 0%      | 0              | 0%      | 0             | 0%      | 0               | 0%      | 0             | 0%      | 0                | 0%      |

VM: venous malformation; CM: capillary malformation; AVM: arteriovenous malformation; LM: lymphatic malformation; KT/PW: Klippel–Trenaunay syndrome/Parkes–Weber syndrome
